# Supplementary material for: Goitre Prevalence and Urinary Iodine Concentration in School-Aged Children in the Ashanti Region of Ghana
Source: Hindawi journal article supplement (doi:10.1155/2020/3759786), 2020-03-23
Supplement: f1 [file 3759786.f1.pdf]

**Supplementary Table 1: Descriptive statistics of thyroid volume measured by ultrasonography and Goitre frequency according to age among male and female students**

| <b>Age (years)</b> | <b>Sex</b> | <b>Students (n)</b> | <b>Minimum (mL)</b> | <b>Maximum (mL)</b> | <b>P50 (mL)</b> | <b>P97 (mL)</b> | <b>Goitre frequency</b> | <b>Goitre prevalence</b> |
|--------------------|------------|---------------------|---------------------|---------------------|-----------------|-----------------|-------------------------|--------------------------|
| <b>6</b>           | Female     | 22                  | 1.18                | 3.60                | 2.10            | NC              | NC                      | NC                       |
|                    | Male       | 26                  | 1.20                | 3.10                | 2.31            | NC              | NC                      | NC                       |
| <b>7</b>           | Female     | 26                  | 1.23                | 3.70                | 2.45            | NC              | NC                      | NC                       |
|                    | Male       | 26                  | 1.29                | 3.80                | 2.10            | NC              | NC                      | NC                       |
| <b>8</b>           | Female     | 58                  | 1.43                | 4.10                | 3.00            | 4.10            | 4                       | 6.9%                     |
|                    | Male       | 42                  | 1.31                | 4.30                | 2.73            | 4.30            | 2                       | 4.8%                     |
| <b>9</b>           | Female     | 46                  | 2.10                | 5.40                | 3.30            | 5.40            | 2                       | 4.3%                     |
|                    | Male       | 74                  | 1.51                | 5.00                | 2.90            | 4.83            | 2                       | 2.7%                     |
| <b>10</b>          | Female     | 114                 | 1.67                | 5.80                | 3.50            | 5.40            | 4                       | 3.5%                     |
|                    | Male       | 96                  | 1.91                | 5.20                | 3.50            | 5.10            | 2                       | 2.1%                     |
| <b>11</b>          | Female     | 72                  | 2.19                | 7.00                | 3.80            | 7.00            | 1                       | 1.4%                     |
|                    | Male       | 98                  | 2.13                | 6.30                | 3.50            | 6.30            | 0                       | 0                        |
| <b>12</b>          | Female     | 78                  | 2.07                | 7.20                | 4.40            | 7.20            | 0                       | 0                        |
|                    | Male       | 74                  | 2.09                | 6.60                | 3.50            | 6.55            | 2                       | 2.7%                     |

**P50 - median; P97 - 97th percentile; NC-not computed**

**Supplementary Table 2: Descriptive statistics of thyroid volume measured by ultrasonography and Goitre frequency according to BSA (m<sup>2</sup>) among male and female students**

| <b>BSA (m<sup>2</sup>)</b> | <b>Sex</b> | <b>Students (n)</b> | <b>Minimum (mL)</b> | <b>Maximum (mL)</b> | <b>P50 (mL)</b> | <b>P97 (mL)</b> | <b>Goitre frequency</b> | <b>Goitre prevalence</b> |
|----------------------------|------------|---------------------|---------------------|---------------------|-----------------|-----------------|-------------------------|--------------------------|
| <b>0.7</b>                 | Female     | 4                   | 1.56                | 2.30                | 1.93            | NC              | NC                      | NC                       |
|                            | Male       | 10                  | 1.20                | 2.10                | 1.40            | NC              | NC                      | NC                       |
| <b>0.8</b>                 | Female     | 40                  | 1.18                | 3.70                | 2.16            | 3.70            | 0                       | 0                        |
|                            | Male       | 42                  | 1.31                | 3.50                | 2.13            | 3.50            | 0                       | 0                        |
| <b>0.9</b>                 | Female     | 72                  | 1.23                | 4.40                | 2.60            | 4.38            | 2                       | 2.8%                     |
|                            | Male       | 70                  | 1.51                | 3.96                | 2.60            | 3.94            | 2                       | 2.9%                     |
| <b>1.0</b>                 | Female     | 102                 | 1.67                | 5.00                | 3.50            | 4.90            | 2                       | 2.0%                     |
|                            | Male       | 90                  | 2.13                | 4.70                | 3.10            | 4.70            | 0                       | 0                        |
| <b>1.1</b>                 | Female     | 72                  | 2.10                | 5.60                | 3.95            | 5.54            | 2                       | 2.8%                     |
|                            | Male       | 80                  | 2.20                | 5.20                | 3.25            | 5.20            | 0                       | 0                        |
| <b>1.2</b>                 | Female     | 70                  | 2.50                | 7.20                | 4.00            | 7.20            | 0                       | 0                        |
|                            | Male       | 96                  | 2.69                | 6.40                | 4.10            | 6.40            | 0                       | 0                        |
| <b>1.3</b>                 | Female     | 56                  | 2.10                | 7.10                | 4.60            | 7.10            | 0                       | 0                        |
|                            | Male       | 48                  | 2.54                | 6.60                | 3.65            | 6.60            | 0                       | 0                        |

**P50 - median; P97 - 97th percentile; BSA - body surface area; NC-not computed**
